# Supplementary material
Source: publisher figshare collection journal article supplement (https://gsajournals.figshare.com/articles/dataset/_/7800728)
Supplement: Supplementary file 1 [file 2]

Table S1: Strain Genotypes

| <u>Strain name</u> | <u>Relevant genotype</u>                                                                                                                                                                                                  | <u>Figure</u> |
|--------------------|---------------------------------------------------------------------------------------------------------------------------------------------------------------------------------------------------------------------------|---------------|
| MJL3906, 3907      | <i>CCT6'</i> - <i>natMX</i> -[ <i>arg4-VRS</i> ]- <i>KLTRP1</i> - ' <i>SND1</i> <i>pCUP1</i><br>-----<br><i>CCT6-SND1'</i> - <i>URA3</i> -[ <i>arg4-VRS103</i> ]- ' <i>CCT6-SND1</i> <i>pCUP1-VDE-hygMX-pCUP1-CUP1</i>    | 3, S2         |
| MJL3915            | MJL3907 + <i>mLh3Δ::KanMX/mLh3Δ::KanMX</i>                                                                                                                                                                                | 3, S2         |
| MJL3944, 3945      | MJL3907 + <i>pch2Δ::URA3/pch2Δ::TRP1</i>                                                                                                                                                                                  | 4, S2         |
| MJL3952, 3953      | MJL3907 + <i>pch2Δ::URA3/pch2Δ::TRP1, mLh3Δ::KanMX/mLh3Δ::KanMX</i>                                                                                                                                                       | 4, S2         |
| MJL3908, 3909      | <i>IMD3'</i> - <i>natMX</i> -[ <i>arg4-VRS</i> ]- <i>KLTRP1</i> - ' <i>AGT23</i> <i>pCUP1</i><br>-----<br><i>IMD3-ATG23'</i> - <i>URA3</i> -[ <i>arg4-VRS103</i> ]- ' <i>IMD3-AGT23</i> <i>pCUP1-VDE-hygMX-pCUP1-CUP1</i> | 3, S2         |
| MJL3916, 3917      | MJL3909 + <i>mLh3Δ::KanMX/mLh3Δ::KanMX</i>                                                                                                                                                                                | 3, S2         |
| MJL3946, 3947      | MJL3909 + <i>pch2Δ::URA3/pch2Δ::TRP1</i>                                                                                                                                                                                  | 4, S2         |
| MJL3954            | MJL3909 + <i>pch2Δ::URA3/pch2Δ::TRP1, mLh3Δ::KanMX/mLh3Δ::KanMX</i>                                                                                                                                                       | 4, S2         |
| MJL3910, 3911      | <i>RIM15'</i> - <i>natMX</i> -[ <i>arg4-VRS</i> ]- <i>KLTRP1</i> - ' <i>HAC1</i> <i>pCUP1</i><br>-----<br><i>RIM15-HAC1'</i> - <i>URA3</i> -[ <i>arg4-VRS103</i> ]- ' <i>RIM15-HAC1</i> <i>pCUP1-VDE-hygMX-pCUP1-CUP1</i> | 3, S2         |
| MJL3918, 3919      | MJL3911 + <i>mLh3Δ::KanMX/mLh3Δ::KanMX</i>                                                                                                                                                                                | 3, S2         |
| MJL3948, 3949      | MJL3911 + <i>pch2Δ::URA3/pch2Δ::TRP1</i>                                                                                                                                                                                  | 4, S2         |
| MJL3955, 3956      | MJL3911 + <i>pch2Δ::URA3/pch2Δ::TRP1, mLh3Δ::KanMX/mLh3Δ::KanMX</i>                                                                                                                                                       | 4, S2         |
| MJL3912, 3913      | <i>TRK2'</i> - <i>natMX</i> -[ <i>arg4-VRS</i> ]- <i>KLTRP1</i> - ' <i>FMP46</i> <i>pCUP1</i><br>-----<br><i>TRK2-FMP46'</i> - <i>URA3</i> -[ <i>arg4-VRS103</i> ]- ' <i>TRK2-FMP46</i> <i>pCUP1-VDE-hygMX-pCUP1-CUP1</i> | 3, S2         |
| MJL3920, 3921      | MJL3913 + <i>mLh3Δ::KanMX/mLh3Δ::KanMX</i>                                                                                                                                                                                | 3, S2         |
| MJL3950, 3951      | MJL3913 + <i>pch2Δ::URA3/pch2Δ::TRP1</i>                                                                                                                                                                                  | 4, S2         |
| MJL3957, 3958      | MJL3913 + <i>pch2Δ::URA3/pch2Δ::TRP1, mLh3Δ::KanMX/mLh3Δ::KanMX</i>                                                                                                                                                       | 4, S2         |
| MJL3879            | <i>hsp30::URA3</i> -[ <i>arg4-VRS103</i> ] <i>pCUP1</i><br>-----<br><i>hsp30::natMX</i> -[ <i>arg4-VRS</i> ]- <i>KLTRP1</i> <i>pCUP1-VDE-hygMX-pCUP1-CUP1</i>                                                             | 3, S2         |
| MJL3881            | MJL3879 + <i>mLh3Δ::KanMX/mLh3Δ::KanMX</i>                                                                                                                                                                                | 3, S2         |
| MJL3976, 3977      | MJL3879 + <i>pch2Δ::URA3/pch2Δ::TRP1</i>                                                                                                                                                                                  | 4, S2         |
| MJL3970, 3978      | MJL3879 + <i>pch2Δ::URA3/pch2Δ::TRP1, mLh3Δ::KanMX/mLh3Δ::KanMX</i>                                                                                                                                                       | 4, S2         |
| MJL3880            | <i>FIR1'</i> - <i>URA3</i> -[ <i>arg4-VRS103</i> ]- ' <i>ZRG8</i> <i>pCUP1</i><br>-----<br><i>FIR1'</i> - <i>natMX</i> -[ <i>arg4-VRS</i> ]- <i>KLTRP1</i> - ' <i>ZRG8</i> <i>pCUP1-VDE-hygMX-pCUP1-CUP1</i>              | 3, S2         |
| MJL3971, 3972      | MJL3880 + <i>mLh3Δ::KanMX/mLh3Δ::KanMX</i>                                                                                                                                                                                | 3, S2         |

| <u>Strain name</u> | <u>Relevant genotype</u>                                            | <u>Figure</u> |
|--------------------|---------------------------------------------------------------------|---------------|
| MJL3969, 3973      | MJL3880 + <i>pch2Δ::URA3/pch2Δ::TRP1</i>                            | 4, S2         |
| MJL3974, 3975      | MJL3880 + <i>pch2Δ::URA3/pch2Δ::TRP1, mLh3Δ::KanMX/mLh3Δ::KanMX</i> | 4, S2         |

All strains are homozygous for *lys2*, *ho::LYS2*, *ura3Δ(hindIII-smal)*, *leu2*, *arg4Δ(eco47III-hpaI)*, *trp1::hisG*, and *VMA1-103*. *pch2Δ::URA3* and *pch2Δ::TRP1* delete sequences between *Accl* and *BamHI* and between *Accl* and *SpeI* sites in *PCH2* coding sequences, respectively. Multiple strain names for a given genotype represent independently derived diploids, both of which were used. Strains used for inserts at *HIS4* and at *URA3* have been described (MEDHI *et al.* 2016)
