# Supplementary material
Source: publisher figshare collection journal article supplement (https://gsajournals.figshare.com/articles/dataset/_/7800728)
Supplement: Supplementary file 1 [file 2]

## Sheet: Figure 1
Gene name	Chromosome	chromosome length (nt)	insert co-ordinates	Centromere coordinates	Hop1 occupancy/nt around insert (decile-normalized ChIP/WCE)			Spo11-oligo reads/nt around insert (hits per million/bp)
					2 kb	10 kb	20 kb	2 kb	10 kb	20 kb
HSP30/YCR021C	III	316620	156647:156638	114385:114501	0.537762	0.463971	0.384523	0.047	0.0835	0.08245
CCT6/YDR188W	IV	1531933	835943:836042	449711:449821	0.283197	0.730512	0.885071	4.191	0.8925	0.48905
FIR1/YER032W	V	576874	217899:217929	151987:152104	1.34924	0.709149	0.515922	0	0.1624	0.2592
RIM15/YFL033C	VI	270161	74560:74561	148510:148627	0.364695	0.904681	1.14711	1.6715	0.4646	0.25245
TRK2/YKR050W	XI	666816	527445:527461	440129:440246	0.94482	1.07601	0.879914	0.8765	0.7677	0.5405
IMD3/YLR432W	XII	1078177	1002106:1002301	150828:150947	0.663084	0.822006	0.656628	0.872	0.1744	0.3085
HIS4/YCL030C	III	316620	65834:67715	114385:114501	2.54526	1.26225	0.883321	0.2115	0.0762	0.08555
URA3/YEL021W	V	576874	115943:116919	151987:152104	0.44541	0.38935	0.337964	0.07	0.101	0.1721
Values reflect average Hop1 occupancy (Panizza et al 2011) and Spo11-oligo reads (Pan et al 2011) for the indicated interval around the inserts used. Chromosome coordinates are from S288c reference genome R64-2-1 (01/13/2015); https://downloads.yeastgenome.org/sequence/S288C_reference/genome_releases/S288C_reference_genome_R64-2-1_20150113.tgz

## Sheet: Figs 2 + 3
Data for Shodhan et al.			all values are % of total lane signal
	Figure 2									Figure 3
	Crossovers				Noncrossovers					Crossovers				Noncrossovers
	MLH3		mlh3∆		MLH3		mlh3∆			MLH3 pch2∆		mlh3∆ pch2∆		MLH3 pch2∆		mlh3∆ pch2∆
CCT6
8h	6.025	6.41	6.175	5.81	24.47	28.6	25.62	26.38		8.915	8.365	6.69	6.67	24.94	28.03	28.14	32.2
9h	5.45	6.355	6.125	5.545	23	26.88	22.49	24.41			7.04		4.695		23.18		22.94
IMD3
8h	9.305	10.99	7.27	8.925	24.47	24.05	22.65	27.48		11.785	11.33	7.305	8.55	22.88	25.56	23.4	27.65
9h	8.405	11.005	6.69	9.245	20.49	22.44	20.01	26.98			11.57		8.055		25.14		25.37
TRK2
8h	7.075	8.86	9.15	8.145	17.6	25.41	22.65	29.24		11.37	9.655	7.735	9.13	27.98	24.57	31.22	26.85
9h	6.125	7.52	8.41	7.61	6.66	21.28	20.75	25.36			10.245		8.185		26.05		28.78
FIR1
8h	9.065	8.69	7.095	8.665	20.44	21.03	22.44	24.07		7.84	8.455	6.415	6.78	20.08	22.1	23.67	24.56
9h	9.275	9.39	6.115	7.835	22.29	21.24	21.67	23.99		9.885	9.68	6.52	7	22.85	24.17	22.23	25.65
RIM15
8h	6.56	10.065	5.47	9.205	18.27	21.49	12.36	27.43		7.715	9.295	7.385	7.51	19.49	22.01	25.87	25.71
9h	8.645	9.38	8.03	8.375	13.99	22.35	14.33	26.25			10.305		7.92		23.4		28.24
HSP30
8h	9.31	9.27	7.12	7.78	27.26	22.92	26.04	27.86		9.695	7.115	6.07	5.275	27.29	22.24	26.61	24.93
9h	8.555	9.33	7.59	7.17	26.94	25.5	27.41	27.97		9.115	8.385	6.48	5.81	24.66	26.68	27.68	25.85
URA3
8h	7.895	7.445	7.075	7.185	19.75	23.82	23.77	24.75		9.215	7.055	5.085	5.445	29.8	23.13	25.79	26.16
9h	7.99	7.095	6.86	6.63	21.12	23.81	23.18	23.96		9.52	7.07	4.91	5.335	30.86	22.86	25.71	27.2
HIS4
8h	9.61	11.855	3.59	4.77	15.81	24.97	20.75	20.36		11.86	11.215	9.1	8.92	26.29	26.61	26.49	29.12
9h	8.09	11.55	3.995	4.795	20.32	24.74	19.63	20.51		10.42	11.185	8.98	8.945	24.79	26.2	27.54	28.82

## Sheet: Fig S2
Panel A. Values are % of cells with 3 or 4 nuclei										Panel B. Values are % of total lane signal
	wild type		mlh3∆		pch2∆		pch2∆ mlh3∆										HIS4		URA3
h in meiosis	exp1	exp2	exp1	exp2	exp1	exp2	exp1	exp2		h in meiosis	CCT6	IMD3	RIM15	TRK2	HSP30	FIR1	exp1	exp2	exp1	exp2
CCT6										0	0	0	0	0	0	0	0	0	0	0
0	0	0	0	0	0	0	0	0		1	1.27964	0		0	0.65	0	0.67	0.952381	2.67872	2.26449
5	5	21	10	34	8	10	9	10		2	2.20645	0.61	0.84	0.35	2.15	1.84	3.07	4.36642	6.66667	4.80648
6	38	49	36	59	24	17	11	26		3		2.77		1.69	5.36	5.65	5.66	7.0308	11.0471	8.52669
7	54	64	58	71	56	39	40	32		4	6.28571	3.61	4.61	4.8	7.45	7.34	5.13	5.52498	14.2297	8.40936
8	69	73	65	70	56	56	70	58		5	5.08552	5.27	4.16	5.48	6.29	5.37	4.3	3.30614	3.39885	3.37079
9	73	92	76	81	74	74	68	85		6	3.75763	3.96	2.33	3.01	3.56	2.67	2.55	1.82474	2.26904	1.90217
RIM15										7	2.58907	1.64	1.29	1.69	2.44	1.3	1.83	1.47524	2.11588	1.30528
0	0	0	0	0	0	0	0	0		8	1.876	0.19	1.01	1.01	1.12	0.41	1.21	1.08838	1.64915	1.14363
5	20	20	8	18	6	24	6	11		9	1.43654	0.7	0.91	0.99	0.66	0.28	1.14	1.0501	1.15498	1.03442
6	38	45	24	51	20	31	14	36
7	64	64	55	56	20	24	35	42
8	72	74	67	76	46	51	58	49
9	80	84	76	84	53	67	61	73
IMD3
0	0	0	0	0	0	0	0	0
5	3	14	19	14	5	12	5	11
6	43	48	28	49	26	19	18	23
7	67	65	47	53	35	46	32	47
8	68	76	64	67	50	65	36	52
9	76	88	70	84	70	83	55	73
TRK2
0	0	0	0	0	0	0	0	0
5	7	5	4	6	8	4	5	8
6	12	32	20.5	46	26	24	26	24
7	35	56	39	60	52	45	29	43
8	55	65	57.9208	58	74	50	63	59
9	65	80	71	78	89	77	74	71
HSP30
0	0	0	0	0	0	0	0	0
5	11	8	7	10	3	4	7	4
6	41	25	40	24	7	13	13	13
7	68	59	52	53	30	27	24	21
8	76	71	67	58	49	47	49	35
9	88	88	87	85	68	62	69	57
FIR1
0	0	0	0	0	0	0	0	0
5	12	6	10	25	6	3	6	3
6	40	25	34	38	10	7	17	10
7	63	53	50	57	21	22	23	25
8	78	66	73	78	59	43	59	41
9	86	77	81	78	61	70	67	59
