# Supplementary material
Source: publisher figshare collection journal article supplement (https://gsajournals.figshare.com/articles/dataset/_/7800728)
Supplement: Supplementary file 4 [file 2]

Table S2: Primers for all reporter inserts

**Ends-out transformations**

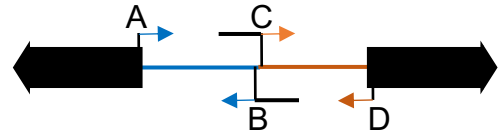

| Strain      | Primer          | sequence                                                                       |
|-------------|-----------------|--------------------------------------------------------------------------------|
| CCT6- SND1  | VRS primer A    | TGTCTGCTGCATGTTGGAGT                                                           |
| CCT6- SND1  | VRS primer B    | atcatgccctgagctgcgcacgtcaagactgtcaaggaagcttgcggccGTTG<br>CCATGCTTACCGTTCT      |
| CCT6- SND1  | VRS primer C    | ttcacctcttagtcttctggcctcgaggcgagctcgaattcaagcttgcGTTAAC<br>GTCGTCGTTCTCC       |
| CCT6- SND1  | VRS primer D    | GGATTGTAAGCCCTCAGCAG                                                           |
| IMD3- ATG23 | VRS primer A    | TATCCTCCGGATGCTTGTC                                                            |
| IMD3- ATG23 | VRS primer B    | atcatgccctgagctgcgcacgtcaagactgtcaaggaagcttgcggccACTG<br>GGTCACTGGAAAAAGG      |
| IMD3- ATG23 | VRS primer C    | ttcacctcttagtcttctggcctcgaggcgagctcgaattcaagcttgcTTGTGT<br>TCATTTCTAACTCTGGT   |
| IMD3- ATG23 | VRS primer D    | GTCCATTGGAGAGGAAACGA                                                           |
| RIM15- HAC1 | VRS primer A    | TAGTGGCGGTTGTTGTCG                                                             |
| RIM15- HAC1 | VRS primer B    | atcatgccctgagctgcgcacgtcaagactgtcaaggaagcttgcggccAGAA<br>AAACCTGGAAATATAGTCACG |
| RIM15- HAC1 | VRS primer C    | ttcacctcttagtcttctggcctcgaggcgagctcgaattcaagcttgcTTTCTT<br>CGTCCCTTTTGTGG      |
| RIM15- HAC1 | VRS primer D    | CGGCTGCCTTTATCTTGAAC                                                           |
| TRK2- NAP1  | VRS primer A    | AACTTCTGCAGGTCCATCC                                                            |
| TRK2- NAP1  | VRS primer B    | atcatgccctgagctgcgcacgtcaagactgtcaaggaagcttgcggccCAAA<br>GTGTCAAGCCGTTGTG      |
| TRK2- NAP1  | VRS primer C    | ttcacctcttagtcttctggcctcgaggcgagctcgaattcaagcttgcGCATAG<br>CGACGGGATTAGAG      |
| TRK2- NAP1  | VRS primer D    | CGACAGCGTGATCAGGTAGA                                                           |
| HSP30       | VRS primer A    | CATCGTCCGTAGCATGGTG                                                            |
| HSP30       | VRS primer B    | atcatgccctgagctgcgcacgtcaagactgtcaaggaagcttgcggccCG<br>CTGTTAATTCAAATCGTGGG    |
| HSP30       | VRS primer C    | ttcacctcttagtcttctggcctcgaggcgagctcgaattcaagcttgcATCC<br>AAGGCGGAAATGTCGTC     |
| HSP30       | VRS primer D    | GGGCTTAATCCACCACATGGC                                                          |
| FIR1- ZRG8  | VRS primer A    | GATGAGGATGAAGATGTAGGC                                                          |
| FIR1- ZRG8  | VRS primer B    | atcatgccctgagctgcgcacgtcaagactgtcaaggaagcttgcggccCA<br>GAATTGGCATGTCTGAA       |
| FIR1- ZRG8  | VRS primer C    | ttcacctcttagtcttctggcctcgaggcgagctcgaattcaagcttgcCTAC<br>CAAAGATCATCCTTGGA     |
| FIR1- ZRG8  | VRS primer D    | CGCATAGTTTTAATGGGAAATTAAC                                                      |
| HSP30       | VRS103 primer A | CATCGTCCGTAGCATGGTG                                                            |

|            |                 |                                                                           |
|------------|-----------------|---------------------------------------------------------------------------|
| HSP30      | VRS103 primer B | aatcaaaaaaagaataaaaaaaaatgatgaattgaattgaagcgccc<br>GCTGTTAATTCAAATCGTGGG  |
| HSP30      | VRS103 primer C | tggtatggcttcattcagctccggtccaacgatcaaggcgaagcttgcATC<br>CAAGGCGGAAATGTCGTC |
| HSP30      | VRS103 primer D | GGGCTTAATCCACCACATGGC                                                     |
| FIR1- ZRG8 | VRS103 primer A | GATGAGGATGAAGATGTAGGC                                                     |
| FIR1- ZRG8 | VRS103 primer B | aatcaaaaaaagaataaaaaaaaatgatgaattgaattgaagcgccc<br>AGAATTGGCATGTCTGAA     |
| FIR1- ZRG8 | VRS103 primer C | tggtatggcttcattcagctccggtccaacgatcaaggcgaagcttgcCTA<br>CCAAAGATCATCCTTGGA |
| FIR1- ZRG8 | VRS103 primer D | CGCATAGTTTTAATGGGAAATTAAC                                                 |

## Ends-in transformations

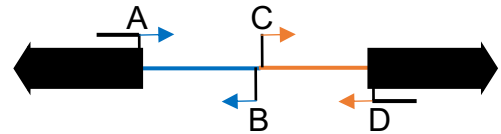

| Strain      | Primer          | sequence                                                                 |
|-------------|-----------------|--------------------------------------------------------------------------|
| CCT6- SND1  | VRS103 primer A | tggtatggcttcattcagctccggtccaacgatcaaggcgaagcttgcTGCT<br>GCTGCATGTTGGAGT  |
| CCT6- SND1  | VRS103 primer B | GTTGCCATGCTTACCGTTCT                                                     |
| CCT6- SND1  | VRS103 primer C | GTTAACGTCGTCGCTTCTCC                                                     |
| CCT6- SND1  | VRS103 primer D | aatcaaaaaaagaataaaaaaaaatgatgaattgaattgaagcgcccGG<br>ATTGTAAGCCCTCAGCAG  |
| IMD3- ATG23 | VRS103 primer A | tggtatggcttcattcagctccggtccaacgatcaaggcgaagcttgcTATCC<br>TCCGGATGCTTGTC  |
| IMD3- ATG23 | VRS103 primer B | TCTTGTGGATCTCGGAAGG                                                      |
| IMD3- ATG23 | VRS103 primer C | GGGACCCTTGAGGTTTACT                                                      |
| IMD3- ATG23 | VRS103 primer D | aatcaaaaaaagaataaaaaaaaatgatgaattgaattgaagcgcccGTC<br>CATTGGAGAGGAAACGA  |
| RIM15- HAC1 | VRS103 primer A | tggtatggcttcattcagctccggtccaacgatcaaggcgaagcttgcTAGTG<br>GCGGTTGTTGTCG   |
| RIM15- HAC1 | VRS103 primer B | CTCCAGGAGTGGTTAAGAGG                                                     |
| RIM15- HAC1 | VRS103 primer C | GCCTGCTGTAGAGTTCTG                                                       |
| RIM15- HAC1 | VRS103 primer D | aatcaaaaaaagaataaaaaaaaatgatgaattgaattgaagcgcccCG<br>GCTGCCTTTATCTTGAAC  |
| TRK2- NAP1  | VRS103 primer A | tggtatggcttcattcagctccggtccaacgatcaaggcgaagcttgcACACT<br>TCTGCAGGTCCATCC |
| TRK2- NAP1  | VRS103 primer B | CAAAGTGTCAGCCGTTGTG                                                      |
| TRK2- NAP1  | VRS103 primer C | GCATAGCGACGGGATTAGAG                                                     |
| TRK2- NAP1  | VRS103 primer D | aatcaaaaaaagaataaaaaaaaatgatgaattgaattgaagcgcccCG<br>ACAGCGTGATCAGGTAGA  |

Primers are color-coded to correspond with Figure S1: black—plasmid sequences; tan or blue—corresponding yeast chromosomal sequences.
